# Supplementary material for: Synthesis of a novel strontium-based wide-bandgap semiconductor via X-ray photochemistry under extreme conditions
Source: Royal Society of Chemistry journal article supplement (doi:10.1039/c8tc04496a), 2018-01-01
Supplement: c8tc04496a1.pdf [file c8tc04496a1.pdf]

## Supplementary information

### Synthesis of a novel strontium-based wide-bandgap semiconductor via X-ray photochemistry at extreme conditions.

Egor Evylukhin<sup>1\*</sup>, Eunja Kim<sup>1</sup>, Petrika Cifligu<sup>1</sup>, David Goldberger<sup>1</sup>, Sarah Schyck<sup>1</sup>, Blake Harris<sup>1</sup>, Sindi Torres<sup>1</sup>, George R. Rossman<sup>2</sup>, Michael Pravica<sup>1</sup>

<sup>1</sup>Department of Physics and Astronomy, University of Nevada Las Vegas (UNLV), Las Vegas, Nevada, 89154-4002, USA.

<sup>2</sup>Division of Geological and Planetary Sciences, California Institute of Technology, Pasadena, California 91125, USA.

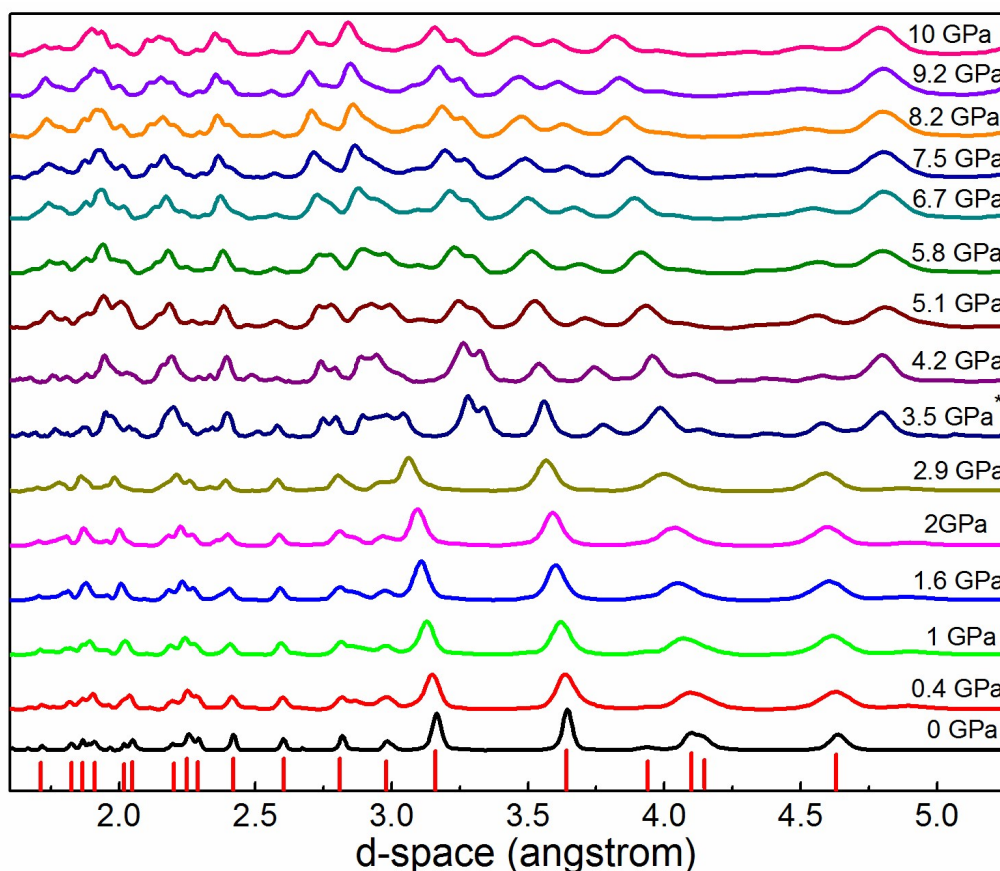

**FIG. S1. XRD patterns of strontium oxalate at different pressure points (up to 10 GPa).** The \* symbol identifies the pressure point where the phase transition occurred. Red bars correspond to the previously-reported crystal structure of strontium oxalate (see FIG S2).

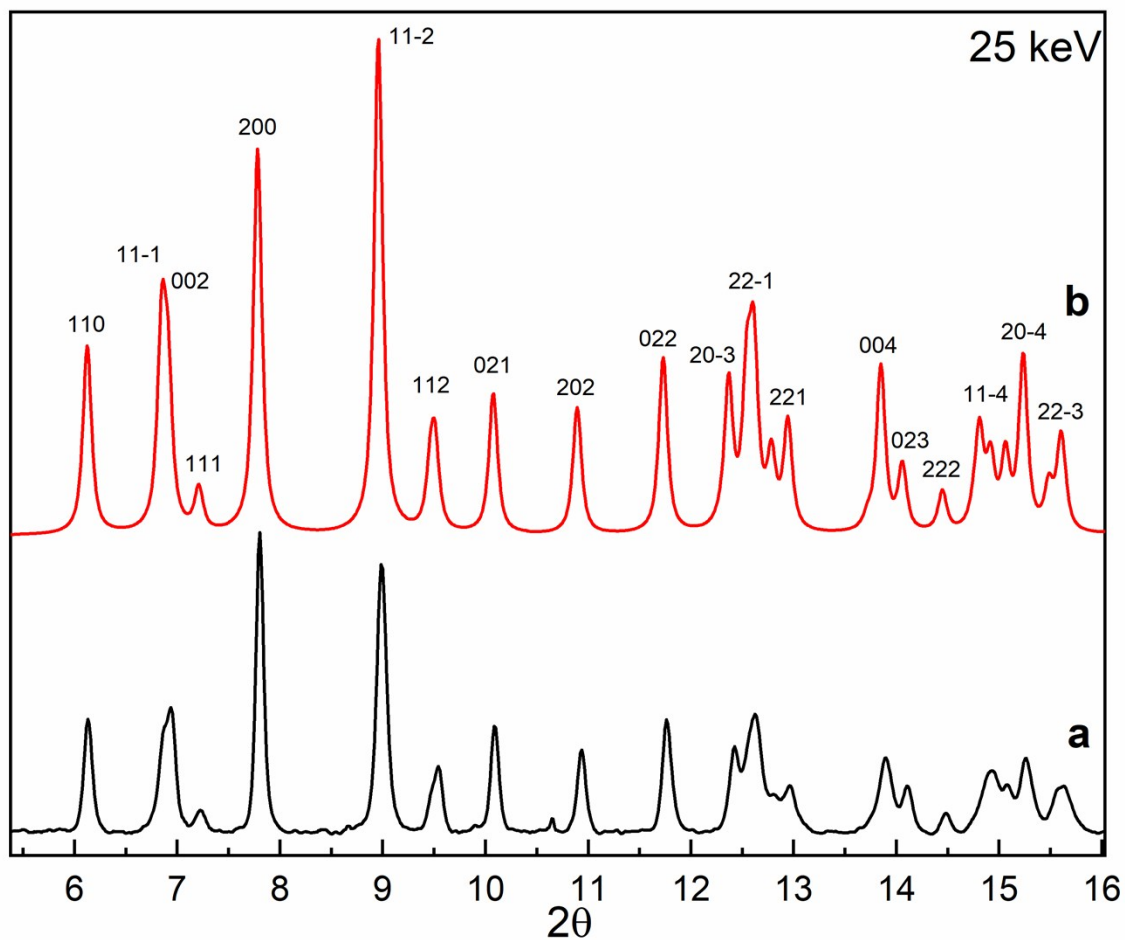

**FIG. S2. XRD patterns of strontium oxalate at ambient conditions at 25 keV X-ray energy:** a) experimentally obtained XRD pattern in this work, b) XRD pattern of monoclinic crystal structure of strontium oxalate<sup>1</sup> with a space group  $C2/c$  and lattice parameters:  $a = 7.3410 \text{ \AA}$ ,  $b = 6.012 \text{ \AA}$ , and  $c = 8.267 \text{ \AA}$ . Diffraction peaks are labeled with corresponding Miller indices.

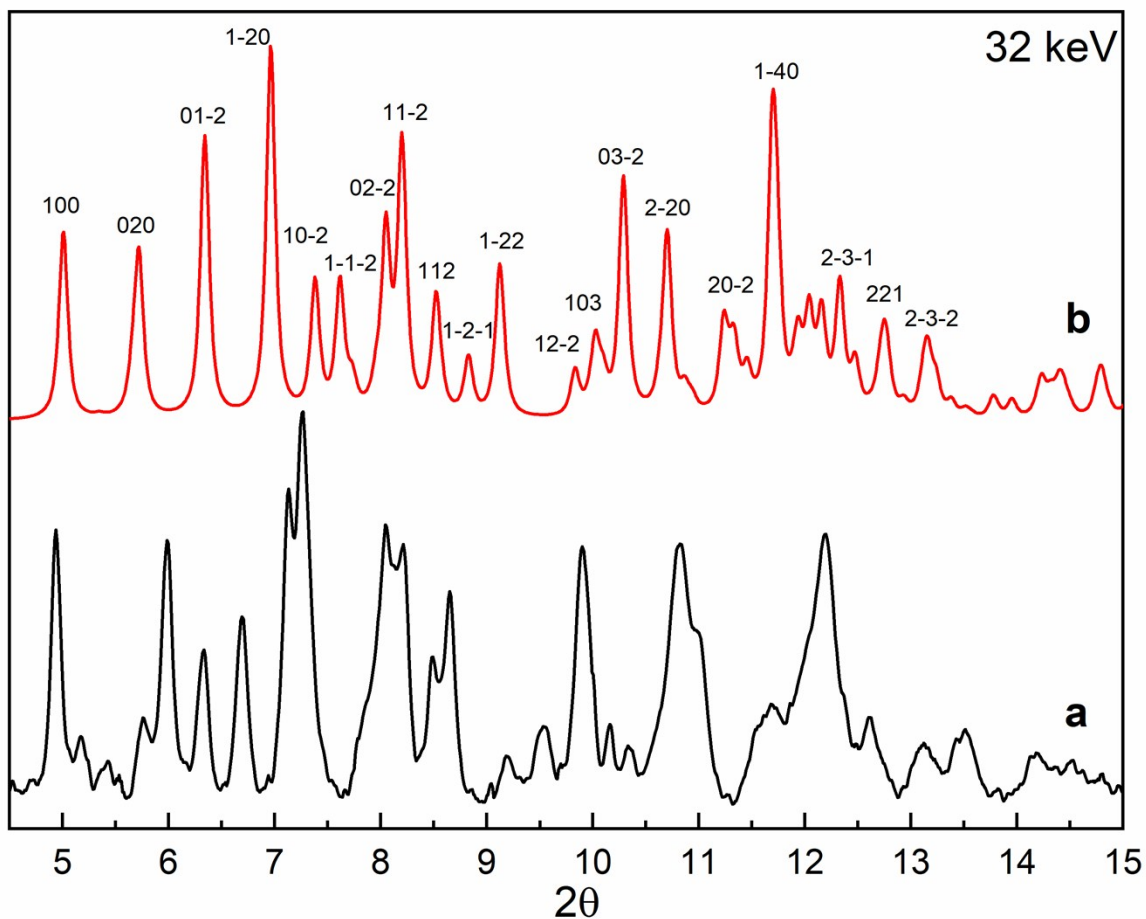

**FIG. S3. XRD patterns of strontium oxalate at 4.2GPa:** a) experimentally obtained XRD pattern in this work, b) XRD pattern of theoretically predicted triclinic crystal structure of  $\text{SrC}_2\text{O}_4$  at pressure  $\geq 3.5$  GPa with space group  $P-1$  and lattice parameters  $a = 4.797 \text{ \AA}$ ,  $b = 8.3763 \text{ \AA}$ ,  $c = 8.3899 \text{ \AA}$  and  $\alpha = 89.6^\circ$ ,  $\beta = 80.6^\circ$ ,  $\gamma = 87.3^\circ$ . Diffraction peaks are labeled with corresponding Miller indices.

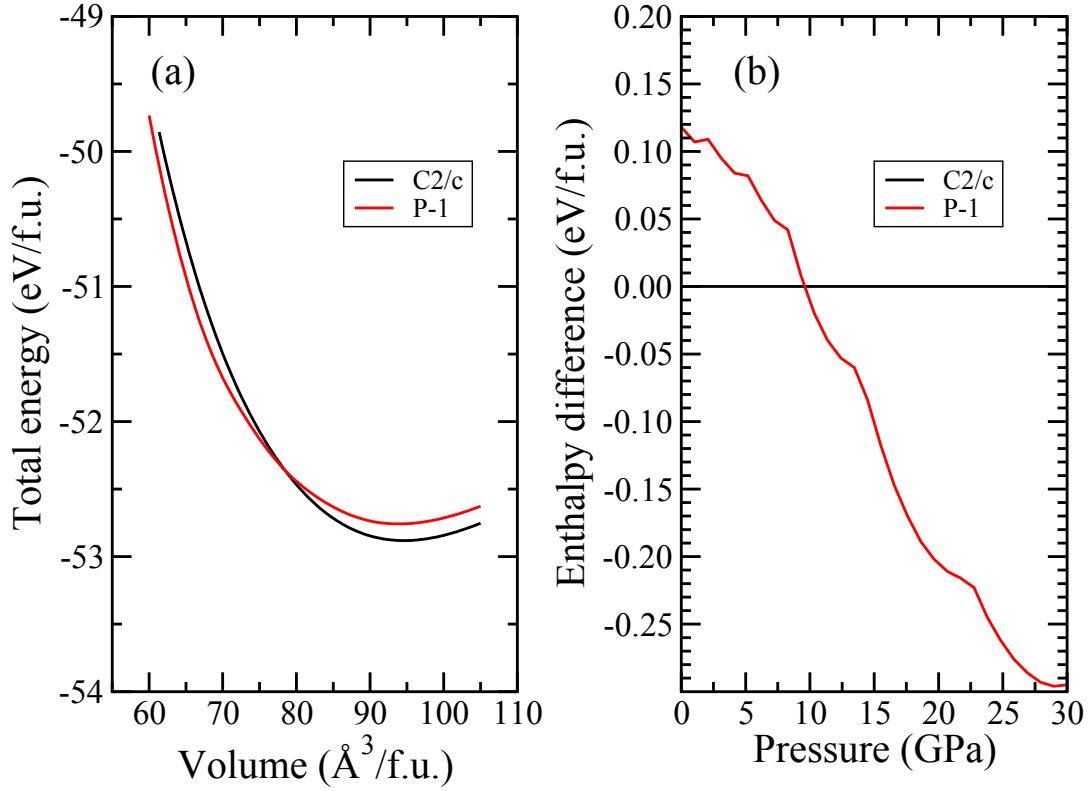

**FIG. S4. Pressure-induced phase transition of  $\text{SrC}_2\text{O}_4$  predicted from DFT calculations:** (a) total energy curves and (b) enthalpy difference between the ambient  $\text{SrC}_2\text{O}_4$  phase (space group  $C2/c$ ,  $Z=4$ ; back line) and the high pressure phase (space group  $P-1$ ,  $Z=4$ ; red line). The units are in eV/f.u.,  $\text{\AA}^3/\text{f.u.}$ , and GPa for energy, volume, and pressure, respectively. The calculated transition pressure from  $C2/c$  to  $P-1$  is predicted between 9-10 GPa. However, the energy difference between  $C2/c$  and  $P-1$  phases is less than 0.12 eV/f.u. or 0.02 eV/atom, indicating the possible coexistence of both phases between 3-10 GPa as observed experimentally in XRD patterns.

**Table S1.** Values of synthesis pressure, thickness and optical bandgap of the DAC-synthesized samples.

| Pressure, GPa | Thickness, $\mu\text{m}$ | Bandgap, eV |
|---------------|--------------------------|-------------|
| 1.03          | 0.038                    | 2.45        |
| 1.98          | 0.033                    | 2.46        |
| 4.00          | 0.034                    | 2.46        |
| 5.36          | 0.033                    | 2.49        |
| 7.13          | 0.027                    | 2.53        |
| 8.20          | 0.036                    | 2.53        |
| 8.89          | 0.030                    | 2.50        |
| 9.80          | 0.040                    | 2.52        |

1. D. J. Price, A. K. Powell, and P.T. Wood, *Polyhedron*, 1999, **18**, 2499.
